# Supplementary material for: Sex and gender differences in autism spectrum disorder: summarizing evidence gaps and identifying emerging areas of priority
Source: PubMed Central journal article supplement (PMC4465158; doi:10.1186/s13229-015-0019-y), 2015-06-13
Supplement: 13229_2015_19_MOESM1_ESM.pdf [file 13229_2015_19_MOESM1_ESM.pdf]

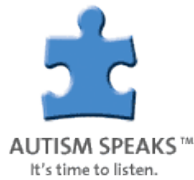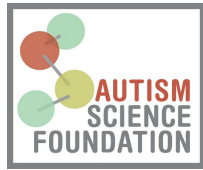

# AGENDA

## Sex and Gender Differences in Autism Spectrum Disorders

October 29, 2014

Doubletree Metropolitan Hotel, NYC

|                     |                                                                                                                                                                                                                                                   |                                                                                                                                                                 |
|---------------------|---------------------------------------------------------------------------------------------------------------------------------------------------------------------------------------------------------------------------------------------------|-----------------------------------------------------------------------------------------------------------------------------------------------------------------|
| 8:30 am – 9:00 am   | Continental breakfast                                                                                                                                                                                                                             |                                                                                                                                                                 |
| 9:00 am – 9:30 am   | Welcome and Introductions                                                                                                                                                                                                                         |                                                                                                                                                                 |
| 9:30 am – 9:45 am   | Perspectives of a parent and women on the spectrum                                                                                                                                                                                                | Alison Singer, Kate Palmer                                                                                                                                      |
| 9:45 am – 10:15am   | The big question: What are the current challenges in understanding sex differences in ASD?                                                                                                                                                        | Presenter: Peter Szatmari<br>Facilitator: Meng-Chuan Lai<br>Discussants: Amy Daniels, Alice Kau, Alice Luo Clayton, Lisa Gillotty, Kate Palmer, Avi Reichenberg |
| 10:15 am – 10:45 am | Discussion                                                                                                                                                                                                                                        |                                                                                                                                                                 |
| 10:45 am -11:00 am  | Break                                                                                                                                                                                                                                             |                                                                                                                                                                 |
| 11:00 am – 11:30 am | What do girls and women “look” like and are they underdiagnosed?                                                                                                                                                                                  | Presenter: Somer Bishop<br>Facilitator: Lonnie Zwaigenbaum<br>Discussants: Audrey Thurm, Meghan Miller, Becky Landa, Rene Jamison, Pamela Ventola               |
| 11:30 am – 12:00 pm | Discussion                                                                                                                                                                                                                                        |                                                                                                                                                                 |
| 12:00 pm – 1:30 pm  | Lunch<br>Each table will be asked to pick from the following questions to discuss:                                                                                                                                                                |                                                                                                                                                                 |
|                     | <ul style="list-style-type: none"><li>• What is the main challenge of women vs. men with ASD?</li><li>• What is not being researched but should be?</li><li>• If researchers are missing girls to study, what can be done to find them?</li></ul> |                                                                                                                                                                 |

---

Text

---

---

|                          |                                                                                                         |                                                                                                                                                     |
|--------------------------|---------------------------------------------------------------------------------------------------------|-----------------------------------------------------------------------------------------------------------------------------------------------------|
| <b>1:30 pm – 2:00 pm</b> | <b>What are the early developmental trajectories of boys and girls? When do we see the differences?</b> | Presenter: Daniel Messinger<br>Facilitator: Ami Klin<br>Discussants: Helen Tager-Flusberg,<br>Sara Webb, Greg Young, Kasia<br>Chawarska, Ted Hutman |
|--------------------------|---------------------------------------------------------------------------------------------------------|-----------------------------------------------------------------------------------------------------------------------------------------------------|

---

|                          |            |
|--------------------------|------------|
| <b>2:00 pm – 2:30 pm</b> | Discussion |
|--------------------------|------------|

---

---

|                          |                                                                                                                                                     |                                                                                                                                               |
|--------------------------|-----------------------------------------------------------------------------------------------------------------------------------------------------|-----------------------------------------------------------------------------------------------------------------------------------------------|
| <b>2:30 pm – 3:00 pm</b> | <b>What happens to girls with autism in adolescence and adulthood?<br/>What are the gender issues that affect outcome and how do we study them?</b> | Presenter: Julie Taylor<br>Facilitator: Kathy Koenig<br>Discussants: Marisela Huerta,<br>Jessica Schuttler, Sharon Valencia,<br>Carmen McLean |
|--------------------------|-----------------------------------------------------------------------------------------------------------------------------------------------------|-----------------------------------------------------------------------------------------------------------------------------------------------|

---

|                          |            |
|--------------------------|------------|
| <b>3:00 pm – 3:30 pm</b> | Discussion |
|--------------------------|------------|

---

---

|                          |                                                                                                |                                                                                                                                                                |
|--------------------------|------------------------------------------------------------------------------------------------|----------------------------------------------------------------------------------------------------------------------------------------------------------------|
| <b>3:30 pm – 4:00 pm</b> | <b>What are the causes of the disparity in boys and girls? Are they protected in some way?</b> | Presenter: Stephan Sanders<br>Facilitator: John Constantino<br>Discussants: Christine Nordahl,<br>Kevin Pelphrey, Donald Pfaff, Sara<br>Schaafsma, Alison Jack |
|--------------------------|------------------------------------------------------------------------------------------------|----------------------------------------------------------------------------------------------------------------------------------------------------------------|

---

|                          |            |
|--------------------------|------------|
| <b>4:00 pm – 4:30 pm</b> | Discussion |
|--------------------------|------------|

---

---

|                          |                                                               |                              |
|--------------------------|---------------------------------------------------------------|------------------------------|
| <b>4:30 pm – 5:00 pm</b> | <b>Priorities going forward and future plans for research</b> | Facilitator: Alycia Halladay |
|--------------------------|---------------------------------------------------------------|------------------------------|

---

Questions can be emailed to [ahalladay@autismsciencefoundation.org](mailto:ahalladay@autismsciencefoundation.org)  
or texted to 908 963 5345
